# Supplementary material for: Endometriosis is not the endometrium: Reviewing the over-representation of eutopic endometrium in endometriosis research
Source: eLife. 2025 May 20;14:e103825. doi: 10.7554/eLife.103825 (PMC12092000; doi:10.7554/eLife.103825)
Supplement: Supplementary file 1. — Contains search methods, exclusion criteria, and links to the source and publications relating to all publicly available datasets as described in the article. Year of publication, platform, biospecimen type and use of relevant controls also listed. [file elife-103825-supp1.xlsx]

## Sheet: Summary
Aim:	To investigate the biospecimen origin of publicly available datasets pertaining to endometriosis
Method:	Search of datasets on NCBI Gene Expression Omnibus and ArrayExpress								INCLUDED STUDIES	Number	Percentage
Search Parameters: "endometriosis"[All Fields] AND "Homo sapiens"[porgn]					Completed: 27 January 2025				Total included	122
									Datasets with >1 biospecimen type	3
Yielded:									Endometrium only	45	36.8852
OVERALL	Number	Percentage		EXCLUSION REASONS	Number	Percentage			Immortal cell line (total)	13	10.6557
Total results	245			Total excluded	123				12Z	7	53.8462
Included	122	49.7959		Not human	1	0.813008			EEC16	5	38.4615
Excluded	123	50.2041		Duplicate datasets	74	60.1626			iHEECs	1	7.69231
				Endometriosis only mentioned in rationale	47	38.2114			Non-lesion (total)	14	11.4754
				Technical Reason (only data for negative control)	1	0.813008			Blood and blood vessels	9	64.2857
									Reproductive Tract	5	35.7143
									Primary Tissue Culture	17	13.9344
									Primary Cells	16	94.1176
									Primary Organoids	1	6.25
									Endometrioma	12	70.5882
									No phenotype listed	5	29.4118
									Stromal	16	94.1176
									Epithelial	1	5.88235
									Without biological control	3	17.6471
									With biological control	14	82.3529
									Normal endometrium only	6	42.8571
									Eutopic endometrium only	5	35.7143
									Both eutopic and normal	3	21.4286
									Additional controls	0	0
									Tissue	36	29.5082
									Endometrioma only	19	52.7778
									Superficial only	1	2.77778
									Deep infiltrating only	1	2.77778
									Peritoneal, unknown depth	3	8.33333
									No phenotype listed	4	11.1111
									Multiple phenotypes	8	22.2222
									Without biological control	0	0
									With biological control	36	100
									Normal endometrium only	3	8.33333
									Eutopic endometrium only	13	36.1111
									Endometrium unknown source	2	5.55556
									Both eutopic and normal	2	5.55556
									Compared to EAOC	6	16.6667
									Additional controls	10	27.7778

## Sheet: Included Series
Series	Year	Platform	ENDOMETRIUM	NON-LESION ENDO	PRIMARY CELL CULTURE(n, phenotype)	CELL LINE	ENDO TISSUE	BIOLOGICAL CONTROL	CITATION
Series GSE101176	2019	GE Healthcare/Amersham Biosciences CodeLink Human Whole Genome Bioarray	Endometrium - cells
Series GSE11768	2008	Affymetrix Human Genome U95 Version 2 Array	Endometrium - tissue						PMID: 18688027
Series GSE107469	2018	Affymetrix Human Genome U133 Plus 2.0 Array	Endometrium - cells						PMID: 29982401
Series GSE120103	2019	Agilent-014850 Whole Human Genome Microarray 4x44K G4112F	Endometrium - tissue						PMID: 30760267
Series GSE130028	2020	Illumina HumanMethylation450 BeadChip	Endometrium - cells						PMID: 32555663
Series GSE130435	2020	Illumina HiSeq 4000	Endometrium - cells						PMID: 31843088
Series GSE134052	2019	Illumina HiSeq 2500	Endometrium - tissue						PMID: 31552087
Series GSE134056	2019	Illumina NextSeq 500	Endometrium - tissue						PMID: 31552087
Series GSE135485	2019	Illumina HiSeq 3000	Endometrium - tissue						PMID: 32290071
Series GSE135640	2020	Illumina HiSeq 2000	Endometrium - cells						PMID: 32219408
Series GSE139954	2020	Agilent-039494 SurePrint G3 Human GE v2 8x60K Microarray 039381	Endometrium - cells						PMID: 32299427
Series GSE145702	2020	Affymetrix Human Gene 1.0 ST Array AND Illumina HumanMethylation450 BeadChip	Endometrium - cells
Series GSE14808	2009	GE Healthcare/Amersham Biosciences CodeLink Human Whole Genome Bioarray	Endometrium - cells						PMID: 19843877
Series GSE153739	2021	Illumina NextSeq 500	Endometrium - tissue						PMID: 33246341
Series GSE153740	2021	Illumina NextSeq 500	Endometrium - tissue						PMID: 33246341
Series GSE172172	2021	Illumina MiSeq	Endometrium - cells (bacterial)						PMID: 34556738
Series GSE174305	2021	Illumina HiSeq 4000	Endometrium - cells						PMID: 34680104
Series GSE167946	2022	Illumina Genome Analyzer II	Endometrium - cells						PMID: 35494227
Series GSE17504	2009	Affymetrix Human Gene 1.0 ST Array	Endometrium - tissue						PMID: 20068008
Series GSE188915	2021	NextSeq 550	Endometrium - cells (effluent organoids)						PMID: 34945786
Series GSE19834	2010	GE Healthcare/Amersham Biosciences CodeLink Human Whole Genome Bioarray	Endometrium - cells						PMID: 20601541
Series GSE214411	2023	Illumina HiSeq 2000 AND Illumina NovaSeq 6000	Endometrium - tissue
Series GSE216255	2023	Agilent-026652 Whole Human Genome Microarray 4x44K v2	Endometrium - cells						PMID: 37326118
Series GSE202571	2023	NextSeq 550	Endometrium - tissue
Series GSE203191	2022	Illumina NextSeq 500	Endometrium - tissue (effluent)						PMID: 36104692
Series GSE223817	2023	Infinium MethylationEPIC	Endometrium - tissue						PMID: 37587191
Series GSE232713	2023	Illumina HiSeq 2500	Endometrium - tissue
Series GSE31683	2012	Affymetrix Human Genome U133 Plus 2.0 Array	Endometrium - cells						PMID: 22259059
Series GSE35287	2012	Affymetrix Human Gene 1.0 ST Array	Endometrium - cells						PMID: 20864642
Series GSE40007	2014	GE Healthcare/Amersham Biosciences CodeLink Human Whole Genome Bioarray	Endometrium - cells
Series GSE51981	2014	Affymetrix Human Genome U133 Plus 2.0 Array	Endometrium - tissue						PMID: 25243856
Series GSE6364	2007	Affymetrix Human Genome U133 Plus 2.0 Array	Endometrium - tissue						PMID: 17510236
Series GSE7305	2007	Affymetrix Human Genome U133 Plus 2.0 Array	Endometrium - tissue						PMID: 17640886
Series GSE73622	2015	Affymetrix Human Gene 1.0 ST Array	Endometrium - cells						PMID: 27075616
Series GSE73950	2016	Illumina HumanMethylation450 BeadChip	Endometrium - tissue						PMID: 26759613
Series GSE7846	2007	Affymetrix Human Genome U133 Plus 2.0 Array	Endometrium - cells						PMID: 17956924
Series GSE85701	2016	Agilent-021850 SurePrint G3 Human CGH Microarray	Endometrium - tissue
Series GSE262037	2024	Agilent-079487 Arraystar Human LncRNA microarray V4	Endometrium - tissue
Series GSE193928	2024	Illumina HiSeq 2000	Endometrium - tissue
Series GSE268541	2024	MGISEQ-2000RS	Endometrium - cells
Series GSE212787	2024	Illumina NovaSeq 6000	Endometrium - tissue
Series GSE272606	2024	Illumina NovaSeq 6000	Endometrium - tissue
Series GSE275002	2024	NextSeq 550	Endometrium - tissue						PMID: 39595577
E-MTAB-14039	2024	Illumina NovaSeq 6000	Endometrium - tissue						PMID: 34857954
E-MTAB-14058	2024	Visium 10x Genomics v1.3	Endometrium - tissue						PMID: 34857954
Series GSE168214	2021	Illumina HiSeq 4000		Repro - Granulosa cell
Series GSE57832	2014	Illumina HumanMethylation450 BeadChip AND NimbleGen Homo sapiens HG18 expression array		Repro - Choriodecidua					PMID: 25432921
Series GSE205494	2022	Illumina HiSeq 2500		Repro - Follicular fluid
Series GSE220787	2023	Agilent-070156 Human_miRNA_V21.0_Microarray 046064		Repro - Tubal tissue and fluid
Series GSE192636	2024	Illumina NovaSeq 6000		Repro - Granulosa cell
E-MEXP-1251	2007	Affymetrix HG-U133A_2.0		Tissue - endothelial cells and pericytes					PMID: 17989082
Series GSE77182	2016	Custom Affymetrix Human Transcriptome Array		Blood - 10 Serum vs control			Y (5 pooled, mixed phenotype)	Y - 5 pooled eutopic	PMID: 26987697
Series GSE153813	2020	Illumina NextSeq 500		Blood - Plasma					PMID: 34631883
Series GSE133867	2019	Affymetrix Human Transcriptome Array 2.0		Blood - Macrophages
Series GSE182983	2021	Illumina NextSeq 500		Blood - Macrophages
Series GSE69310	2015	NimbleGen Homo sapiens Expression Array		Blood - Serum
Series GSE46735	2013	Applied Biosystems Human TaqMan Low Density Array		Blood - Serum
Series GSE279435	2024	TaqMan™ OpenArray™ Human Advanced MicroRNA Panel, QuantStudio™ 12K Flex		Blood - Serum					PMID: 39457705
Series GSE124010	2018	Agilent-070156 Human_miRNA_V21.0_Microarray 046064		Blood - Serum	Stromal Cell Line (3, not described)			Y -eutopic stromal cells	PMID: 31547870
Series GSE121406	2019	Illumina NextSeq 500			Stromal Cell Line (4, OMA)			Y -eutopic stromal cells	PMID: 30487429
Series GSE135122	2020	NextSeq 550			Stromal Cell Line (6, OMA)				PMID: 32897364
Series GSE136412	2020	Agilent-039494 SurePrint G3 Human GE v2 8x60K Microarray 039381			Stromal Cell Line (4, OMA)			Y - eutopic stromal cells
Series GSE31515	2012	Agilent-014850 Whole Human Genome Microarray 4x44K G4112F			Stromal Cell Line (3, OMA)			Y - 3 eutopic stromal cells and 3 stromal cells from "normal" endometrium	PMID: 22633261
Series GSE40186	2013	Agilent-021827 Human miRNA Microarray G4470C			Stromal Cell Line (8, OMA)			Y - 8 stromal cells from "normal" endometrium	PMID: 23293219
Series GSE44207	2013	Agilent-026652 Whole Human Genome Microarray 4x44K v2			Stromal Cell Line (OMA)				PMID: 23833041
Series GSE47361	2013	Affymetrix Human Gene 1.0 ST Array			Stromal Cell Line (3, OMA)			Y -5 eutopic stromal cells
Series GSE58178	2014	Illumina HumanHT-12 V3.0 expression beadchip			Stromal Cell Line (6, OMA)			Y - 6 stromal cells from"normal" endometrium	PMID: 24992181
Series GSE67524	2016	Agilent-039494 SurePrint G3 Human GE v2 8x60K Microarray 039381			Stromal Cell Line (OMA)				PMID: 27018534
Series GSE75427	2016	Agilent-026652 Whole Human Genome Microarray 4x44K v2 AND Agilent-046064 Unrestricted_Human_miRNA_V19.0_Microarray			Stromal Cell Line (4, OMA)			Y - 4 stromal cells from"normal" endometrium	PMID: 27412773
Series GSE87810	2017	Illumina HiSeq 2000 AND Illumina HumanMethylation450 BeadChip			Stromal Cell Line (5, OMA)			Y - 5 stromal cells from"normal" endometrium	PMID: 28125717
Series GSE243158	2024	Illumina NextSeq 500 AND Illumina NovaSeq 6000			Stromal Cell Line (4, not described)			Y - eutopic stromal and stromal cells from"normal" endometrium
Series GSE132464	2022	Agilent-014850 Whole Human Genome Microarray 4x44K G4112F			Stromal Cell Line (4, OMA, pooled)			Y - stromal cells from "normal" endometrium, pooled
Series GSE269530	2024	Illumina NovaSeq 6000			Stromal Cell Line (5, peritoneal of unknown depth)			Y -5 eutopic stromal cells	PMID: 39744178
Series GSE168902	2022	Illumina NovaSeq 6000			Stromal Cell Line (3, not described)			Y - 3 stromal cells from "normal" endometrium
Series GSE118928	2019	Illumina NextSeq 500			Epithelial Organoid (7, not described)			Y - eutopic endometrium and "normal" endometrium	PMID: 31371824
Series GSE114332	2019	Illumina NextSeq 500				EEC16			PMID: 31619158
Series GSE68104	2015	Illumina HiSeq 2000				EEC16			PMID: 25804953 , PMID: 34965383
Series GSE86572	2017	Illumina HumanHT-12 V4.0 expression beadchip				EEC16
Series GSE97373	2017	Illumina HiSeq 2000				EEC16			PMID: 28483516
Series GSE261931	2024	HiSeq X Five				EEC16
Series GSE184431	2021	Illumina NovaSeq 6000				iHEECs			PMID: 34593556
Series GSE152661	2020	Illumina NextSeq 500 AND Illumina NovaSeq 6000				12Z			PMID: 33075803
Series GSE157735	2020	Illumina NextSeq 500				12Z			PMID: 33176148 , PMID: 35326450
Series GSE174741	2021	Illumina HiSeq 4000				12Z			PMID: 34445100
Series GSE190549	2022	Illumina NovaSeq 6000				12Z			PMID: 36153585
Series GSE202661	2022	Illumina NovaSeq 6000				12Z		Y - stromal cells from "normal" endometrium
Series GSE210201	2022	Illumina NovaSeq 6000				12Z			PMID: 36153585
Series GSE279835	2024	Illumina NovaSeq 6000				12Z	Y (10 OMA)	Y - 10 eutopic endometrium	PMID: 39595577
Series GSE11691	2008	Affymetrix Human Genome U133A Array					Y (9 peritoneal, no depth described)	Y - 9 eutopic endometrium	PMID: 18688027
Series GSE197928	2022	Illumina NextSeq 500					Y (2, OMA)	Y - adjacent stroma, fallopian tube tissue & cells, ovarian cancer tissue	PMID: 35492879
Series GSE12768	2008	Institut Cochin HG18 60mer expression array 47K					Y (2 OMA)	Y - eutopic endometrium	PMID: 18818281
Series GSE141549	2020	Illumina HumanHT-12 V4.0 expression beadchip AND Ilumina Human WG-6 v2.0 expression beadchip					Y (28 OMA, 76 SUP, 86 DIE)	Y - 101 eutopic, 43 "normal" endometrium, 38 lesion-adjacent peritoneum, 24 "normal" peritoneum	PMID: 32859947
Series GSE15309	2009	SAGE:10:NlaIII:Homo sapiens					Y (1 OMA)	Y - 1 "normal" peritoneum, 2 "normal" ovary	PMID: 11257097 , PMID: 12119410
Series GSE157153	2021	Ion Torrent Proton					Y (9 OMA, 18 atypical OMA)	Compared to ovarian cancer tissues	PMID: 33331115
Series GSE16079	2009	Affymetrix Human Promoter 1.0R Array					Y (1 SUP, 1 OMA, 1 bladder DIE)	Y - 1 eutopic	PMID: 20685852
Series GSE179640	2022	Illumina NovaSeq 6000					Y (10 OMA, 13 peritoneal, no depth described)	Y - 17 eutopic endometrium, 8 "normal" endometrium, 7 lesion-adjacent peritoneum	PMID: 35864314
Series GSE185273	2021	Illumina NextSeq 500					Y (3, exosomes from tissue not described)	Y - 3 exosomes from endometrium (source nor described)
Series GSE196748	2022	Illumina NovaSeq 6000					Y (3, OMA)	Compared to ovarian cancer tissues	PMID: 35280730
Series GSE201912	2022	Affymetrix Human Gene 2.0 ST Array					Y (2, OMA)	Y - 2 eutopic, 2 "normal" endometrium
Series GSE213216	2022	Illumina NovaSeq 6000					Y (8 OMA, 28 peritoneal, no depth described)	Y - 10 eutopic endometrium, 4 normal ovary, 4 lesion-adjacent peritoneum	PMID: 36624343
Series GSE226575	2023	Illumina NovaSeq 6000					Y (4, OMA)	Compared to ovarian cancer tissues
Series GSE230956	2023	Illumina NextSeq 500					Y (4, OMA)	Compared to ovarian cancer tissues	PMID: 37621654
Series GSE23339	2011	Illumina human-6 v2.0 expression beadchip					Y (10, OMA)	Y -9 "normal" endometrium	PMID: 21436257
Series GSE239685	2023	Taqman Array Human MicroRNA A Card v2.0					Y (4, OMA)	Compared to ovarian cancer tissues
Series GSE246202	2023	Illumina NextSeq 500					Y (5, OMA)	Y- patient-matched eutopic endometrium
Series GSE25628	2013	Affymetrix Human Genome U133A 2.0 Array					Y (8, DIE)	Y - 8 eutopic, 6 "normal" endometrium	PMID: 23460397
Series GSE26346	2010	LC Sciences_miRNA_Human_v9(1).1					Y (3, OMA)	Y - 3 matched eutopic endometrium	PMID: 20300586
Series GSE37837	2012	Agilent-014850 Whole Human Genome Microarray 4x44K G4112F					Y (18, OMA)	Y - 18 eutopic endometrium	PMID: 23006437
Series GSE5108	2007	GE Healthcare/Amersham Biosciences CodeLink Human Whole Genome Bioarray					Y (6, OMA with stage, 3 peritonal with stage, 2 no phenotype with stage)	Y - 11 eutopic endometrium	PMID: 17462640
Series GSE56414	2015	Illumina Genome Analyzer					Y (5 lesions from 2 patients, peritoneal no depth described)	Y - 2 eutopic endometrium, 4 lesion-adjacent peritoneum	PMID: 25386850
Series GSE57545	2015	NanoString nCounter GX Human Immunology v1					Y (26, not described, 15 atypical)	Y - 30 eutopic endometrium, compared to ovarian cancer tissues	PMID: 25294912
Series GSE71477	2015	LC Sciences MRA-1001-UNT_042313_miRHuman_19					Y (19 pooled, not described)	Compared to ovarian cancer tissues	PMID: 26819681
Series GSE7307	2007	Affymetrix Human Genome U133 Plus 2.0 Array					Y (18, OMA)	Y - 1 myometrium from endometriosis pt, 3 "normal" ovary, 22 "normal" endometrium
Series GSE86534	2019	Agilent-067406 Human CBC lncRNA + mRNA microarray V4.0					Y (4, OMA)	Y - 4 eutopic endometrium, 4 adjacent ovary	PMID: 30496345
Series GSE99949	2018	Ion Torrent PGM					Y (4, not described)	Y - 4 eutopic endometrium	doi.org/10.1134/S1022795418110133
Series GSE229735	2024	Illumina NextSeq 500					Y (1, OMA)	Y - 3 pooled "normal" endometrium	PMID: 38508138
Series GSE105764	2018	Illumina HiSeq 4000					Y (8, OMA)	Y - 8 eutopic endometrium	PMID: 29357938
Series GSE248593	2024	Agilent-085753 Arraystar Human Epitranscriptomic microarray					Y (3 OMA)	Y - 3 normal endometrium
Series GSE281569	2024	Illumina NovaSeq 6000					Y (6 OMA)	Y - endometrium (normal or ectopic not specified)
Series GSE247695	2024	Illumina NovaSeq 6000					Y (4 peritoneal, no depth described)	Y - 4 matched eutopic endometrium	PMID: 39169201
E-MTAB-694	2012	GeneChip HGU133Plus2.0					Y (19 SUP)	Y - 19 matched eutopic endometrium, 18 adjacent peritoneum	PMID: 22878529
Series GSE94414	2017	CustomArray Signaling Pathway platform version 2					Y (4 OMA, 4 peritoneal no depth described)	Y - 6 eutopic endometrium
